# Supplementary material for: Gastric Neuroendocrine Tumors (g-NETs): A Systematic Review of the Management and Outcomes of Type 3 g-NETs
Source: MDPI journal article supplement (doi:10.3390/cancers15082202), 2023-04-08
Supplement: s1 [file s1]

**Table S1** – Search strings used for performing the systematic review of the literature.

| PUBMED and MEDLINE                                                                                                                                                                                                                                                                                                                                                                                                                                                                                                                                                                                                                                                                                                                                                                                                                                                                                                                                                                                                                                                                                                                                                                                                                                                                                                                                                                                                                                                                                                                                                                                                                                                                                                                                                                                                                                                                  | EMBASE                                                                                                                                                                                                                                                                                                                                                                                                                                                                                                                                                                                                                                                                                   |
|-------------------------------------------------------------------------------------------------------------------------------------------------------------------------------------------------------------------------------------------------------------------------------------------------------------------------------------------------------------------------------------------------------------------------------------------------------------------------------------------------------------------------------------------------------------------------------------------------------------------------------------------------------------------------------------------------------------------------------------------------------------------------------------------------------------------------------------------------------------------------------------------------------------------------------------------------------------------------------------------------------------------------------------------------------------------------------------------------------------------------------------------------------------------------------------------------------------------------------------------------------------------------------------------------------------------------------------------------------------------------------------------------------------------------------------------------------------------------------------------------------------------------------------------------------------------------------------------------------------------------------------------------------------------------------------------------------------------------------------------------------------------------------------------------------------------------------------------------------------------------------------|------------------------------------------------------------------------------------------------------------------------------------------------------------------------------------------------------------------------------------------------------------------------------------------------------------------------------------------------------------------------------------------------------------------------------------------------------------------------------------------------------------------------------------------------------------------------------------------------------------------------------------------------------------------------------------------|
| <p>((((((("management"[Title/Abstract] OR<br/> "outcome"[Title/Abstract] OR<br/> "treatment"[Title/Abstract] OR<br/> "survival"[Title/Abstract] OR<br/> "surviving"[Title/Abstract] OR "outcome"[All<br/> Fields] OR "outcomes"[All Fields] OR<br/> "treatment"[All Fields] OR "treatments"[All Fields]<br/> OR "survival"[All Fields] OR "surviv*" [All Fields] OR<br/> "surviving"[All Fields]) AND ("neuroendocrine<br/> neoplasms"[Title/Abstract] OR "neuroendocrine<br/> neoplasm"[Title/Abstract] OR "neuroendocrine<br/> tumours"[Title/Abstract] OR "neuroendocrine<br/> tumors"[Title/Abstract] OR "neuroendocrine<br/> cancers"[Title/Abstract] OR "neuroendocrine<br/> cancer"[Title/Abstract] OR "NET"[Title/Abstract]<br/> OR "NEN"[Title/Abstract] OR "NETs"[Title/Abstract]<br/> OR "NENs"[Title/Abstract] OR "neuroendocrine<br/> neoplasms"[All Fields] OR "neuroendocrine<br/> neoplasm"[All Fields] OR "neuroendocrine<br/> tumours"[All Fields] OR "neuroendocrine<br/> tumors"[All Fields] OR "neuroendocrine<br/> cancers"[All Fields] OR "neuroendocrine<br/> cancer"[All Fields] OR "NET"[All Fields] OR<br/> "NEN"[All Fields] OR "NETs"[All Fields])) OR<br/> "NENs"[All Fields]) AND ("gastric"[Title/Abstract]<br/> OR "stomach"[Title/Abstract] OR "gastr*" [All<br/> Fields] OR "abdom*" [All Fields])) OR "stomach"[All<br/> Fields]) AND ("type 3"[Title/Abstract] OR "type<br/> III"[Title/Abstract] OR "type III"[All Fields] OR "type<br/> 3"[All Fields]) AND ("neurosecretory<br/> systems"[MeSH Terms] OR "stomach<br/> neoplasms"[MeSH Terms] OR "stomach<br/> neoplasms"[MeSH Terms] OR "stomach<br/> neoplasms"[MeSH Terms] OR "stomach<br/> neoplasms"[MeSH Terms] OR "neuroendocrine<br/> tumors"[MeSH Terms] OR "neuroendocrine<br/> tumors"[MeSH Terms])) NOT "review"[Publication<br/> Type]) NOT "adenocarcinoma*" [MeSH Terms]</p> | <p>('neuroendocrine tumor'/exp OR 'neuroendocrine<br/> tumor':ti,ab,kw OR 'neuroendocrine<br/> tumors':ti,ab,kw OR 'neuroendocrine<br/> tumour':ti,ab,kw OR 'neuroendocrine<br/> tumours':ti,ab,kw) AND ('type iii':ti,ab OR 'type<br/> 3':ti,ab) AND ('management'/exp OR 'treatment<br/> outcome'/exp OR 'health care outcome and<br/> process assessment' OR 'healthcare outcome and<br/> process assessment' OR 'medical futility' OR<br/> 'outcome and process assessment (health care)<br/> OR 'outcome and process assessment, health care'<br/> OR 'outcome management' OR 'patient outcome'<br/> OR 'therapeutic outcome' OR 'therapy outcome'<br/> OR 'treatment outcome')</p> |
